# Supplementary material for: Catalytic transformation of glycerol to 1-propanol by combining zirconium phosphate and supported Ru catalysts
Source: Royal Society of Chemistry journal article supplement (doi:10.1039/c6ra02682f), 2016-01-01
Supplement: c6ra02682f1.pdf [file c6ra02682f1.pdf]

## Supporting information

### Catalytic Transformation of Glycerol to 1-Propanol by Combining Zirconium Phosphate and Supported Ru Catalysts

Mengpan Wang,<sup>a</sup> Hanmin Yang,<sup>b</sup> Yinzheng Xie,<sup>a</sup> Xiaohui Wu,<sup>a</sup> Chen Chen,<sup>a</sup>  
Wenbo Ma,<sup>a</sup> Qifeng Dong,<sup>a</sup> and Zhenshan Hou<sup>\*, a, c</sup>

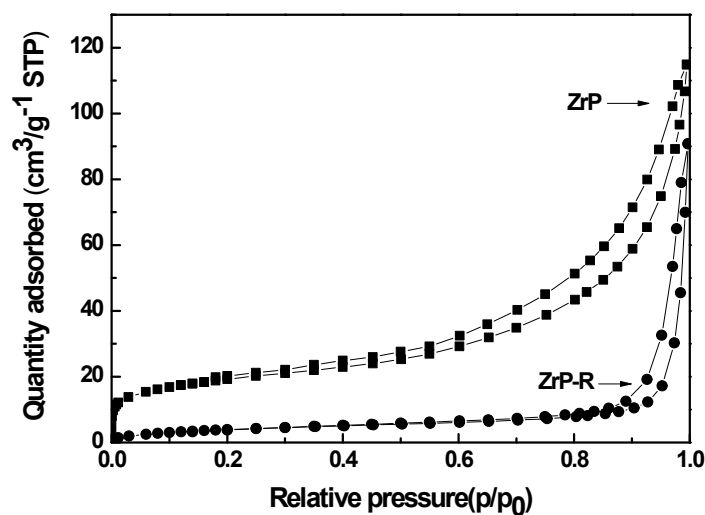

Fig.S1 The nitrogen adsorption and desorption isotherm of ZrP and ZrP-R.

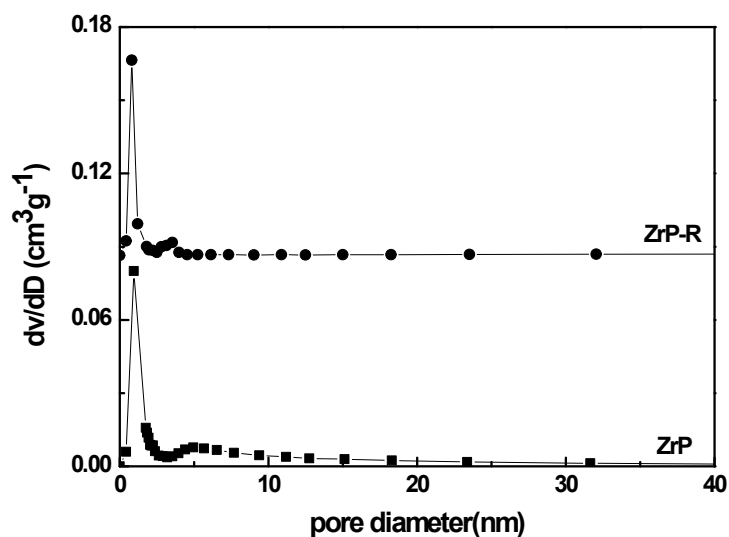

Fig. S2 Pore size distribution curves of ZrP and ZrP-R.
